# Supplementary material for: Design of boronic acid-attributed carbon dots on inhibits HIV-1 entry
Source: Royal Society of Chemistry journal article supplement (doi:10.1039/c6ra21062g), 2016-01-01
Supplement: c6ra21062g1.pdf [file c6ra21062g1.pdf]

## Supporting Information

### Design of boronic acid-attributed carbon dots on inhibits HIV-1 entry

M.Z. Fahmi,<sup>ab\*</sup> W. Sukmayani,<sup>a</sup> S.Q. Khairunisa,<sup>b</sup> A.M. Witaningrum,<sup>b</sup> D.W. Indriati,<sup>b</sup> M.Q.Y. Matondang,<sup>b</sup> J.-Y. Chang,<sup>c</sup> T. Kotaki,<sup>d</sup> and M. Kameoka.<sup>e</sup>

*a.* Department of Chemistry, Airlangga University, Surabaya 61115, Indonesia.

*b.* Institute of Tropical Disease, Airlangga University, Surabaya 61115, Indonesia.

*c.* Department of Chemical Engineering, National Taiwan University of Science and Technology, Taipei 10607, Republic of China.

*d.* Center of Infectious Disease, Graduate School of Medicine, Kobe University, Hyogo 654-0142, Japan

*e.* Department of International Health, Kobe University Graduate School of Health Science, Kobe 654-0142, Japan.

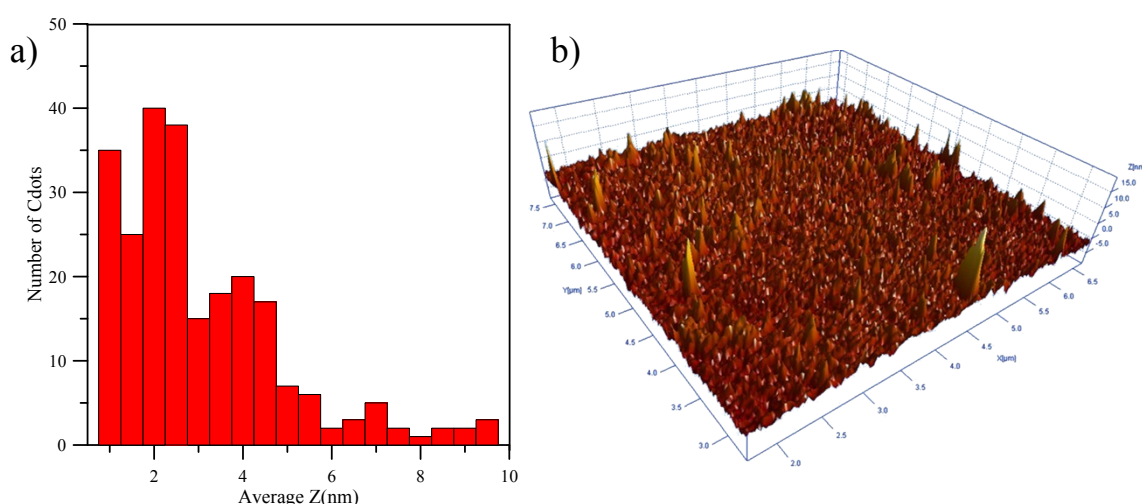

**Figure S1.** AFM data of as-prepared Cdots including histogram its size distribution (a) and AFM image of adjusted Cdots took from top (b).

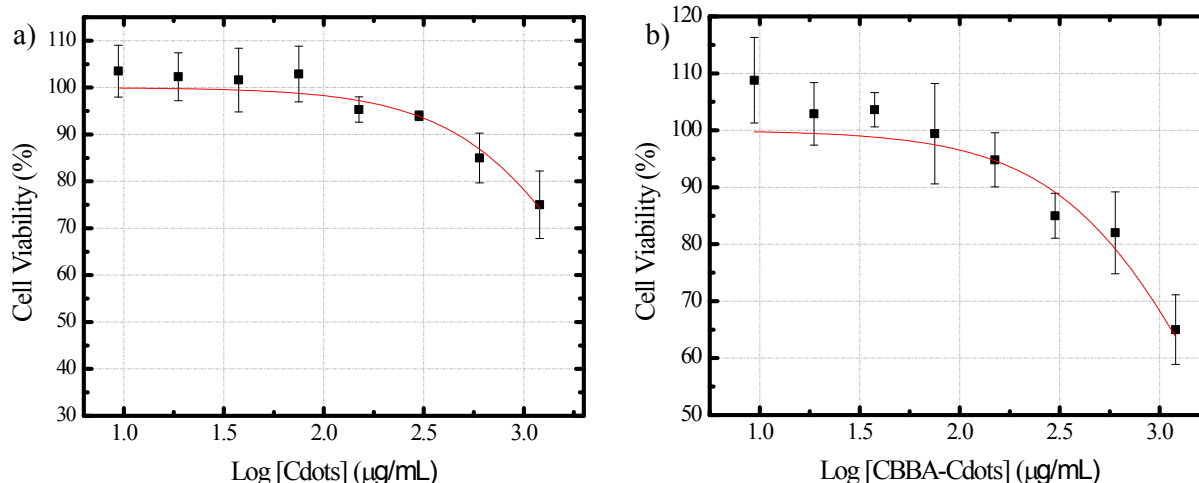

**Figure S2.** Comparison cell viability of MOLT-4 cancer cells after 24 h incubation with Cdots (a) and CBBA-Cdots (b).  $CC_{50}$  values can be determined on red fitted curve, which show at 3.46  $\mu\text{g/mL}$  and 3.29  $\mu\text{g/mL}$  for each log [Sample], respectively, or 2901.2  $\mu\text{g/mL}$  and 1991.9  $\mu\text{g/mL}$  for each [Sample], respectively. Red line indicates fitting curve resulted on doses response mode on Origin software.

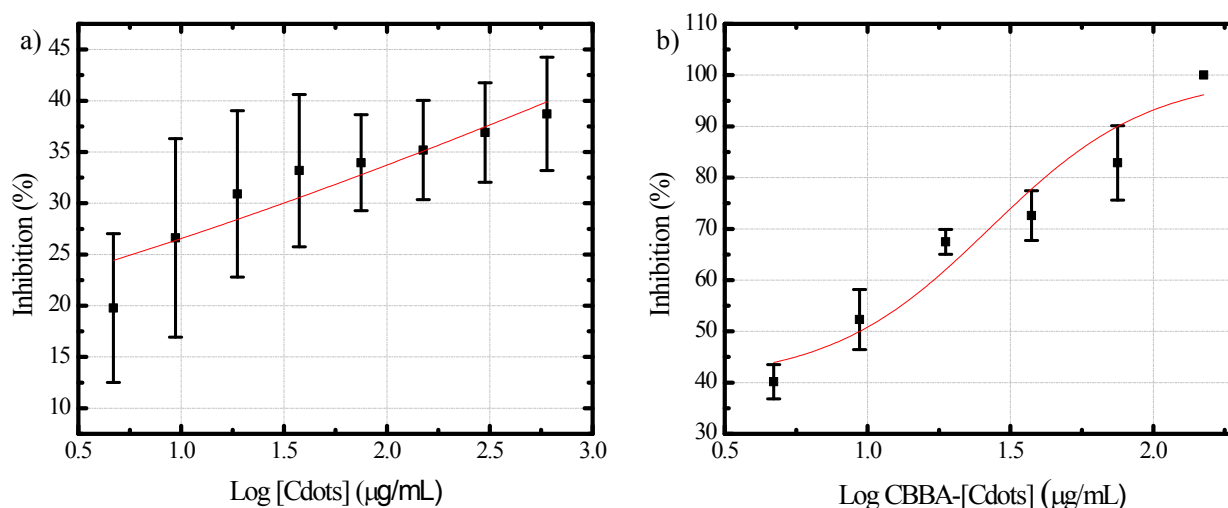

**Figure S3.** Graph of inhibition level of Cdots (a) and CBBA-Cdots (b) to against MT4/HIV-1 infection after 24 h incubation.  $IC_{50}$  values can be determined on red fitted curve, which show at 3.97  $\mu\text{g/mL}$  and 1.43  $\mu\text{g/mL}$  for each log [Sample], respectively, or 9605.3  $\mu\text{g/mL}$  and 26.7  $\mu\text{g/mL}$  for each [Sample], respectively. Red line indicates fitting curve resulted on doses response mode on Origin software.
